# Supplementary material for: Performance Characterisation of the Airvo2TM Nebuliser Adapter in Combination with the Aerogen SoloTM Vibrating Mesh Nebuliser for in Line Aerosol Therapy during High Flow Nasal Oxygen Therapy
Source: MDPI journal article supplement (doi:10.3390/pharmaceutics16040565), 2024-04-20
Supplement: s1 [file s1]

# Supplementary Materials:

## Emitted dose data

**Table S1.** Variations in emitted dose (%) (avg  $\pm$  SD) with changes in gas flow rate (LPM), interface and nasal cannula size for adult devices,  $p < 0.05$  indicates significance.

| Gas Flow (LPM) | OPT942           | OPT944           | OPT946           | P-value | OPT970          |
|----------------|------------------|------------------|------------------|---------|-----------------|
| 10             | 37.78 $\pm$ 2.83 | 39.45 $\pm$ 3.08 | 50.87 $\pm$ 2.74 | 0.000   | 9.38 $\pm$ 0.37 |
| 30             | 25.68 $\pm$ 1.66 | 36.98 $\pm$ 2.85 | 35.74 $\pm$ 3.88 | 0.000   | 7.51 $\pm$ 0.72 |
| 50             | 9.96 $\pm$ 1.59  | Not tested       | Not tested       | -       | 2.21 $\pm$ 0.31 |
| 60             | Not tested       | 11.81 $\pm$ 1.36 | 11.83 $\pm$ 1.55 | 0.984   | Not tested      |
| P-value        | 0.000            | 0.000            | 0.000            | -       | 0.000           |

**Table S2.** Variations in emitted dose (%) (avg  $\pm$  SD) with changes in gas flow rate (LPM) and nasal cannula size for paediatric and infant devices,  $p < 0.05$  indicates significance.

| Gas Flow (LPM) | OPT316           | OPT416           | P-value | OPT318           | OPT418           | P-value |
|----------------|------------------|------------------|---------|------------------|------------------|---------|
| 2              | 30.24 $\pm$ 1.37 | 31.64 $\pm$ 1.67 | 0.006   | 30.89 $\pm$ 1.27 | 31.65 $\pm$ 1.88 | 0.119   |
| 11             | 24.87 $\pm$ 0.65 | 25.16 $\pm$ 0.83 | 0.081   | Not tested       | Not tested       | -       |
| 13             | Not tested       | Not tested       | -       | 25.71 $\pm$ 0.92 | 25.46 $\pm$ 0.78 | 0.720   |
| 20             | 25.71 $\pm$ 0.50 | 25.46 $\pm$ 1.23 | 0.458   | Not tested       | Not tested       | -       |
| 25             | Not tested       | Not tested       | -       | 24.04 $\pm$ 1.10 | 24.68 $\pm$ 1.04 | 0.000   |
| P-value        | 0.000            | 0.000            |         | 0.000            | 0.000            |         |

## Tracheal dose data

**Table S3.** Variations in tracheal dose (%) (avg  $\pm$  SD) with changes in gas flow rate (LPM), interface and nasal cannula size for adult devices,  $p < 0.05$  indicates significance.

| Gas Flow (LPM) | OPT942           | OPT944           | OPT946           | P-value | OPT970          |
|----------------|------------------|------------------|------------------|---------|-----------------|
| 10             | 18.75 $\pm$ 0.83 | 19.32 $\pm$ 0.97 | 21.78 $\pm$ 0.66 | 0.000   | 4.75 $\pm$ 0.53 |
| 30             | 14.43 $\pm$ 0.41 | 5.89 $\pm$ 0.33  | 14.28 $\pm$ 0.49 | 0.000   | 2.84 $\pm$ 0.40 |
| 50             | 5.22 $\pm$ 0.20  | Not tested       | Not tested       | -       | 0.40 $\pm$ 0.08 |
| 60             | Not tested       | 1.77 $\pm$ 0.26  | 1.68 $\pm$ 0.27  | 0.139   | Not tested      |
| P-value        | 0.000            | 0.000            | 0.000            | -       | 0.000           |

**Table S4.** Variations in tracheal dose (%) (avg  $\pm$  SD) with changes in gas flow rate (LPM) and nasal cannula size for paediatric and infant devices,  $p < 0.05$  indicates significance.

| Gas Flow (LPM) | OPT316          | OPT416          | P-value | OPT318          | OPT418          | P-value |
|----------------|-----------------|-----------------|---------|-----------------|-----------------|---------|
| 2              | 8.10 $\pm$ 0.85 | 8.14 $\pm$ 0.74 | 0.581   | 8.14 $\pm$ 0.74 | 9.78 $\pm$ 0.46 | 0.000   |
| 11             | 3.88 $\pm$ 0.36 | 3.81 $\pm$ 0.29 | 0.206   | Not tested      | Not tested      | -       |
| 13             | Not tested      | Not tested      | -       | 4.88 $\pm$ 0.45 | 4.94 $\pm$ 0.26 | 0.522   |
| 20             | 4.45 $\pm$ 0.16 | 4.46 $\pm$ 0.18 | 0.713   | Not tested      | Not tested      | -       |
| 25             | Not tested      | Not tested      | -       | 1.93 $\pm$ 0.35 | 1.89 $\pm$ 0.33 | 0.449   |
| <b>P-value</b> | 0.000           | 0.000           |         | 0.000           | 0.000           |         |

#### GSD data

**Table S5.** Variations in geometric standard deviation (GSD) ( $\mu\text{m}$ ) (avg  $\pm$  SD) with changes in gas flow rate (LPM), interface and nasal cannula size for adult devices,  $p < 0.05$  indicates significance.

| Gas Flow (LPM) | OPT942          | OPT944          | OPT946          | P-value | OPT970          |
|----------------|-----------------|-----------------|-----------------|---------|-----------------|
| 10             | 1.61 $\pm$ 0.04 | 1.68 $\pm$ 0.07 | 1.69 $\pm$ 0.06 | 0.015   | 1.93 $\pm$ 0.10 |
| 30             | 1.64 $\pm$ 0.05 | 1.90 $\pm$ 0.12 | 1.81 $\pm$ 0.08 | 0.003   | 2.50 $\pm$ 0.76 |
| 50             | 1.70 $\pm$ 0.14 | Not tested      | Not tested      | -       | 2.12 $\pm$ 0.38 |
| 60             | Not tested      | 1.78 $\pm$ 0.06 | 1.93 $\pm$ 0.08 | 0.003   | Not tested      |
| <b>P-value</b> | 0.106           | 0.009           | 0.003           |         | 0.406           |

**Table S6.** Variations in geometric standard deviation (GSD) ( $\mu\text{m}$ ) (avg  $\pm$  SD) with changes in gas flow rate (LPM) and nasal cannula size for paediatric and infant devices,  $p < 0.05$  indicates significance.

| Gas Flow (LPM) | OPT316          | OPT416          | P-value | OPT318          | OPT418          | P-value |
|----------------|-----------------|-----------------|---------|-----------------|-----------------|---------|
| 2              | 1.64 $\pm$ 0.07 | 1.68 $\pm$ 0.11 | 0.335   | 1.72 $\pm$ 0.09 | 1.68 $\pm$ 0.13 | 0.542   |
| 11             | 1.77 $\pm$ 0.19 | 1.71 $\pm$ 0.09 | 0.366   | Not tested      |                 | -       |
| 13             | Not tested      |                 | -       | 1.62 $\pm$ 0.05 | 1.62 $\pm$ 0.06 | 0.920   |
| 20             | 1.76 $\pm$ 0.16 | 1.62 $\pm$ 0.09 | 0.048   | Not tested      |                 | -       |
| 25             | Not tested      |                 | -       | 1.61 $\pm$ 0.08 | 1.86 $\pm$ 0.10 | 0.002   |
| <b>P-value</b> | 0.139           | 0.110           |         | 0.012           | 0.000           |         |
